# Supplementary material for: Exploring Information Available to and Used by Physicians on Antibiotic Use and Antibiotic Resistance in Jordan
Source: MDPI journal article supplement (doi:10.3390/antibiotics10080963), 2021-08-10
Supplement: s1 [file s1]

# Survey of physicians' sources of information about antibiotic use and antibiotic resistance

Dear Respondent,

You are invited to complete the following survey of physicians about their knowledge and attitudes about antibiotic use and antibiotic resistance.

Researchers from UK, Jordan University of Science and Technology, and Yarmouk University are seeking responses from physicians. We would really value you completing the survey that will take 5 to 10 minutes to complete. It includes predominantly multiple-choice questions.

Please feel free to cascade the link of the survey widely to colleagues.

In which language would you prefer to complete this survey? ؟ بأيّ لغة تفضل اتمام الاستبيان

English

Arabic

## ➤ Demographic Section

### 1. Please specify in which governorate you practice

Amman

Irbid

Salt

Zarqa

Madaba

Jerash

Ajloun

Mafrq

Karak

Tafilah

Ma'an

Aqaba

### 2. What is your predominant role? (i.e.>50% of your time)?

Generalist

Specialist

Academia/ Research

### 3. Where do you predominantly practice? (i.e. >50% of your time):

Hospital (any hospital type)

University (as an Academic) or research institute

Public clinic  
Private clinic

**4. How many years have you been practicing in your current profession?**

0-2 years  
3-5 years  
6-10 years  
11-15 years  
16-20 years  
21-25 years  
>25 years

**5. What is your age?**

24-35 years  
36-45 years  
46-55 years  
56-65 years  
>66 years

**6. What gender do you identify with?**

Male  
Female

➤ **Used resources for professional activities Section**

**7. Which of the following social media networks do you mainly use for professional activities?  
(Choose all that apply)**

Twitter  
Facebook  
LinkedIn  
Google+  
YouTube  
Instagram  
I do not use social media  
Others \_\_\_\_\_

**8. In the management of infections, which of these do you use regularly? (Choose all that apply)**

Clinical practice guidelines  
Documentation from the pharmaceutical industry  
Medical representatives from industry  
Previous clinical experience  
Continuing education training courses  
Infection specialists  
Scientific journals

Professional resources/publications

Social media

None of the above

I do not know

Others: \_\_\_\_\_

➤ **Sources of information about avoiding unnecessary prescribing of antibiotics Section**

9. In the last 12 months, do you remember receiving any information about avoiding unnecessary prescribing of antibiotics?

Yes

No

Unsure

10. How did you first get this information about avoiding unnecessary prescribing of antibiotics? (Select all that apply).

Colleague or peer

My workplace

Media (TV/Radio) adverts

Social Media

Newspaper

Published guidelines

Training - conference/group

Training - one to one

Government policy

Scientific organization

My medical professional body

Audit and feedback

Others: \_\_\_\_\_

11. Did the information contribute to changing your views about avoiding unnecessary prescribing of antibiotics?

Yes

No

Unsure

12. Which source(s) of information has had the most influence on changing your views? Select no more than 2.

Colleague or peer

My workplace

Media (TV/radio) adverts

Social media

Newspaper

Published guidelines

Training - conference/group

Training - one to one

Government policy

Scientific organization

My medical professional body

Audit and feedback

Others: \_\_\_\_\_

**13. On the basis of the information you received, have you changed your practice on prescribing of antibiotics?**

Yes

No

Unsure

➤ **Awareness of initiatives and national action plans on antimicrobial resistance Section**

**14. What initiatives are you aware of which focus on antibiotic awareness and resistance? Select all that apply**

TV or Radio advertising for the public

Toolkits and resources for healthcare workers

National or regional guidelines on management of infections

Awareness raising from professional organizations

Conference/Events focused on tackling antibiotic resistance

National or regional posters or leaflets on antibiotic awareness

Newspaper (national) articles on antibiotic resistance

World Antibiotic Awareness Week

I am not aware of any initiatives

**15. Does your country have a national action plan on antimicrobial resistance?**

Yes

No

Unsure

**16. On which topics would you like to receive more information? (Choose all that apply)**

Resistance to antibiotics

How to use antibiotics

Medical conditions for which antibiotics are used

Prescription of antibiotics

Links between the health of humans, animals and the environment

None

Others: \_\_\_\_\_
